# Supplementary material for: Nanobubble-mediated cancer cell sonoporation using low-frequency ultrasound
Source: Royal Society of Chemistry journal article supplement (doi:10.1039/d3nr03226d), 2023-01-01
Supplement: d3nr03226d1.pdf [file d3nr03226d1.pdf]

## Supplementary Information

### **Nanobubble-mediated cancer cell sonoporation using low-frequency insonation**

Mike Bismuth,<sup>a</sup> Michal Eck<sup>a</sup> and Tali Ilovitsh<sup>\*,a,b</sup>

<sup>a</sup> Department of Biomedical Engineering, Tel Aviv University, Tel Aviv 6997801, Israel

<sup>b</sup> The Sagol School of Neuroscience, Tel Aviv University, Tel Aviv 6997801, Israel

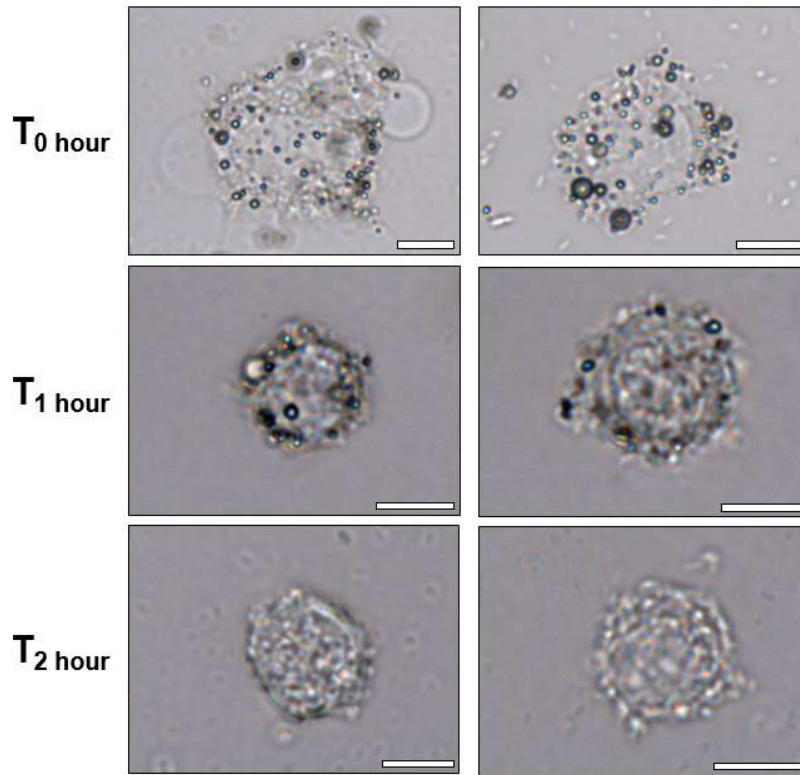

**Fig. S1. Temporal stability of targeted microbubbles when targeted to cells.** Microscope images showing targeted microbubbles attached to 4T1 cell, at 40× magnification at 3 different incubation time points; directly after the bubbles attachment to the cells (0 hour) and 1 and 2 hours of incubation. Scale bar is common to all subfigures and is 10 µm.

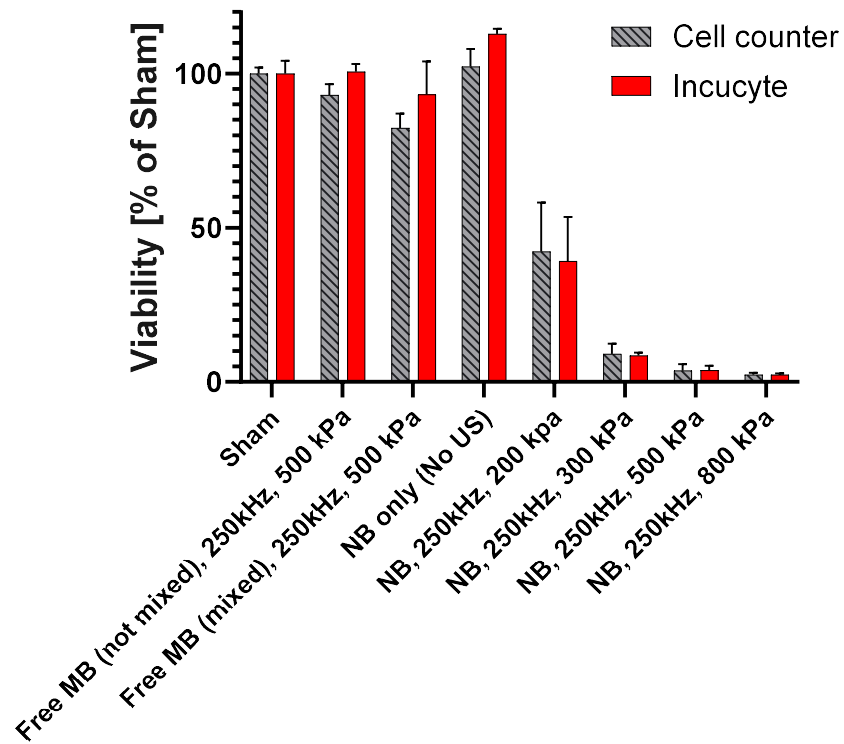

**Fig. S2. Cell viability post-sonoporation treatment obtained by cell-counter and Incucyte system analysis.** Viability of cells expressed as the percentage of the sham group for the different treatment and control groups 1 day after sonoporation. For the cell-counter system viability assessment, the cells were detached from the plate and were collected for counting. With the Incucyte system analysis, the cells were not detached and viability was evaluated using cells confluency. A one-way ANOVA with Tukey's multiple comparison test was conducted. Adjusted p values were ns  $p > 0.05$ . All data are plotted as the mean  $\pm$  SD.
